# Supplementary material for: Post-Covid condition and clinic characteristics associated with SARS-CoV-2 infection: a 2-year follow-up to Brazilian cases
Source: Sci Rep. 2023 Aug 26;13:13973. doi: 10.1038/s41598-023-40586-8 (PMC10460396; doi:10.1038/s41598-023-40586-8)
Supplement: Supplementary file 2 — Supplementary Information 2. [file 41598_2023_40586_MOESM2_ESM.xlsx]

## Sheet: Table A2
Table A2: PCC Questionnaire
a) Infection history
Presence of symptoms persistence (Post-COVID Condition- PCC): ( ) Yes ( ) No
SARS-CoV-2 Reinfection: ( ) Yes ( ) No	Number of reinfections:
Which, of all infections, was related to PCC:	Date of infection related with PCC (If no PCC, date of last infection): __/___/__
Symptoms in days since PCC infection:
b) Symptoms 1 week post infection
Fever ≥38 °C: ( ) Yes ( ) No	Nausea/Vomiting: ( ) Yes ( ) No	Asthma: ( ) Yes ( ) No
Dyspnea: ( ) Yes ( ) No	Chest pain: ( ) Yes ( ) No	Cough: ( ) Yes ( ) No
Arthralgia: ( ) Yes ( ) No	Myalgia: ( ) Yes ( ) No	Headache: ( ) Yes ( ) No
Diarrhea: ( ) Yes ( ) No	Aphonia: ( ) Yes ( ) No	Anosmia: ( ) Yes ( ) No
	Dysgeusia ( ) Yes ( ) No	Other manifestations:
c) Symptoms 13 weeks post infection
Fever ≥38 °C: ( ) Yes ( ) No	Nausea/Vomiting: ( ) Yes ( ) No	Asthma: ( ) Yes ( ) No
Dyspnea: ( ) Yes ( ) No	Chest pain: ( ) Yes ( ) No	Cough: ( ) Yes ( ) No
Arthralgia: ( ) Yes ( ) No	Myalgia: ( ) Yes ( ) No	Headache: ( ) Yes ( ) No
Diarrhea: ( ) Yes ( ) No	Aphonia: ( ) Yes ( ) No	Anosmia: ( ) Yes ( ) No
	Dysgeusia ( ) Yes ( ) No	Other manifestations:
d)Previous medical conditions not related to COVID-19 infection
Obesity: ( ) Yes ( ) No	Diabetes mellitus: ( ) Yes ( ) No	Hypertension: ( ) Yes ( ) No
Cardiovascular Disease: ( ) Yes ( ) No	Atrial Fibrillation: ( ) Yes ( ) No	Peripheral Vascular Disease: ( ) Yes ( ) No
Asthma: ( ) Yes ( ) No	Chronic Obstructive Pulmonary Disease: ( ) Yes ( ) No	Other lung disease: ( ) Yes ( ) No
Cerebrovascular disease: ( ) Yes ( ) No	Neurological disease: ( ) Yes ( ) No	Psychiatric illness: ( ) Yes ( ) No
Rheumatic disease: ( ) Yes ( ) No	Chronic liver disease: ( ) Yes ( ) No	Digestive disease: ( ) Yes ( ) No
Neoplasm: ( ) Yes ( ) No	Immunosuppression: ( ) Yes ( ) No	Co-infections: ( ) Yes ( ) No
Other diagnoses:
In the comorbidities present, specify if there was evolution (improvement or worsen) after COVID-19
d) Medical support
Treatment of persistent COVID-19 symptoms?	( ) No ( ) Yes, however I do not currently ( ) Yes, I do currently ( ) Other:
Performs rehabilitation because of persistent COVID-19 ?	( ) Yes ( ) Yes, but not currently ( ) No, but is on hold ( ) Was not necessary ( ) Gave up / did not participate
Type of rehabilitation	( ) Physical ( ) Cognitive ( ) Olfactory ( ) Others:
e) Disabilities produced as a consequence of PCC
	Unable to perform before COVID-19	Able to perform as before COVID-19	Perform with somewhat effort	Perform with great effort	Unable to perform anymore, but could do it before COVID-19
Personal hygiene	( )	( )	( )	( )	( )
Household activities	( )	( )	( )	( )	( )
Work activities	( )	( )	( )	( )	( )
Family activities	( )	( )	( )	( )	( )
Social activities/leisure activities	( )	( )	( )	( )	( )
f) Health self-assessment
PREVIOUS health status on a scale from 0 (lowest possible) to 10 (best possible):
CURRENT health status on a scale from 0 (lowest possible) to 10 (best possible):
As your health was modified on a scale from 0 (not modified) to 10 ( worsened much):
Current disability grade on a scale from 0 (no disability) to 10 (maximum disability):
g) Vaccination
Are you vaccinated (At least two shots)? ( ) Yes ( ) No
Which vaccines?
( ) Pfizer-BioNTech	( ) Janssen	( ) Oxford - AstraZeneca	( ) CoronaVac
Other:
Last vaccination date:
h) Evolution of symptoms of PCC vaccination
After 1 month:		After 3 months:
( ) Worsened and continues to worsen		( ) Worsened
( ) Improved and continues to improve		( ) Improved
( ) Worsened at first but returned to the previous state		( ) Remained the same
( ) Improved at first but returned to the previous state		( ) Did not complete the vaccination schedule
( ) Did not complete the vaccination schedule		Other:
