# Supplementary material for: Post-Covid condition and clinic characteristics associated with SARS-CoV-2 infection: a 2-year follow-up to Brazilian cases
Source: Sci Rep. 2023 Aug 26;13:13973. doi: 10.1038/s41598-023-40586-8 (PMC10460396; doi:10.1038/s41598-023-40586-8)
Supplement: Supplementary file 3 — Supplementary Information 3. [file 41598_2023_40586_MOESM3_ESM.xlsx]

## Sheet: Table A3
Table A3: Stratification parameters of severity
Asymptomatic: Absence of symptoms
Mild cases: Presence of symptoms; and unnecessary oxygen therapy; and x-ray not performed or with no cell infiltrate; and hospitalization not blank.
Moderate: Presence of symptoms; the necessity of conventional oxygen therapy; x-ray showing cell infiltrate or lungs damage smaller than 50%, and hospitalization not blank.
Severe: Presence of symptoms; and PaO2 < 65; or SaO2/FiO2 min > 0 and SaO2/FiO2 min < 440; or PaO2/FiO2 min > 0 and PaO2/FiO2 min< 300; or dyspnea; or respiratory frequency < 22; or x-ray showing damage higher than 50%
Critical: Presence of symptoms; and admission to an intensive care unit; or necessity of non-invasive ventilation; or high flux cannula.
